# Supplementary material for: Plastome characteristics and species identification of Chinese medicinal wintergreens (Gaultheria, Ericaceae)
Source: PubMed Central journal article supplement — Plant Divers. 2022 Jun 23;44(6):519–29. doi: 10.1016/j.pld.2022.06.002 (PMC9751084; doi:10.1016/j.pld.2022.06.002), 2022-06-23
Supplement: mmc1.pdf [file mmc1.pdf]

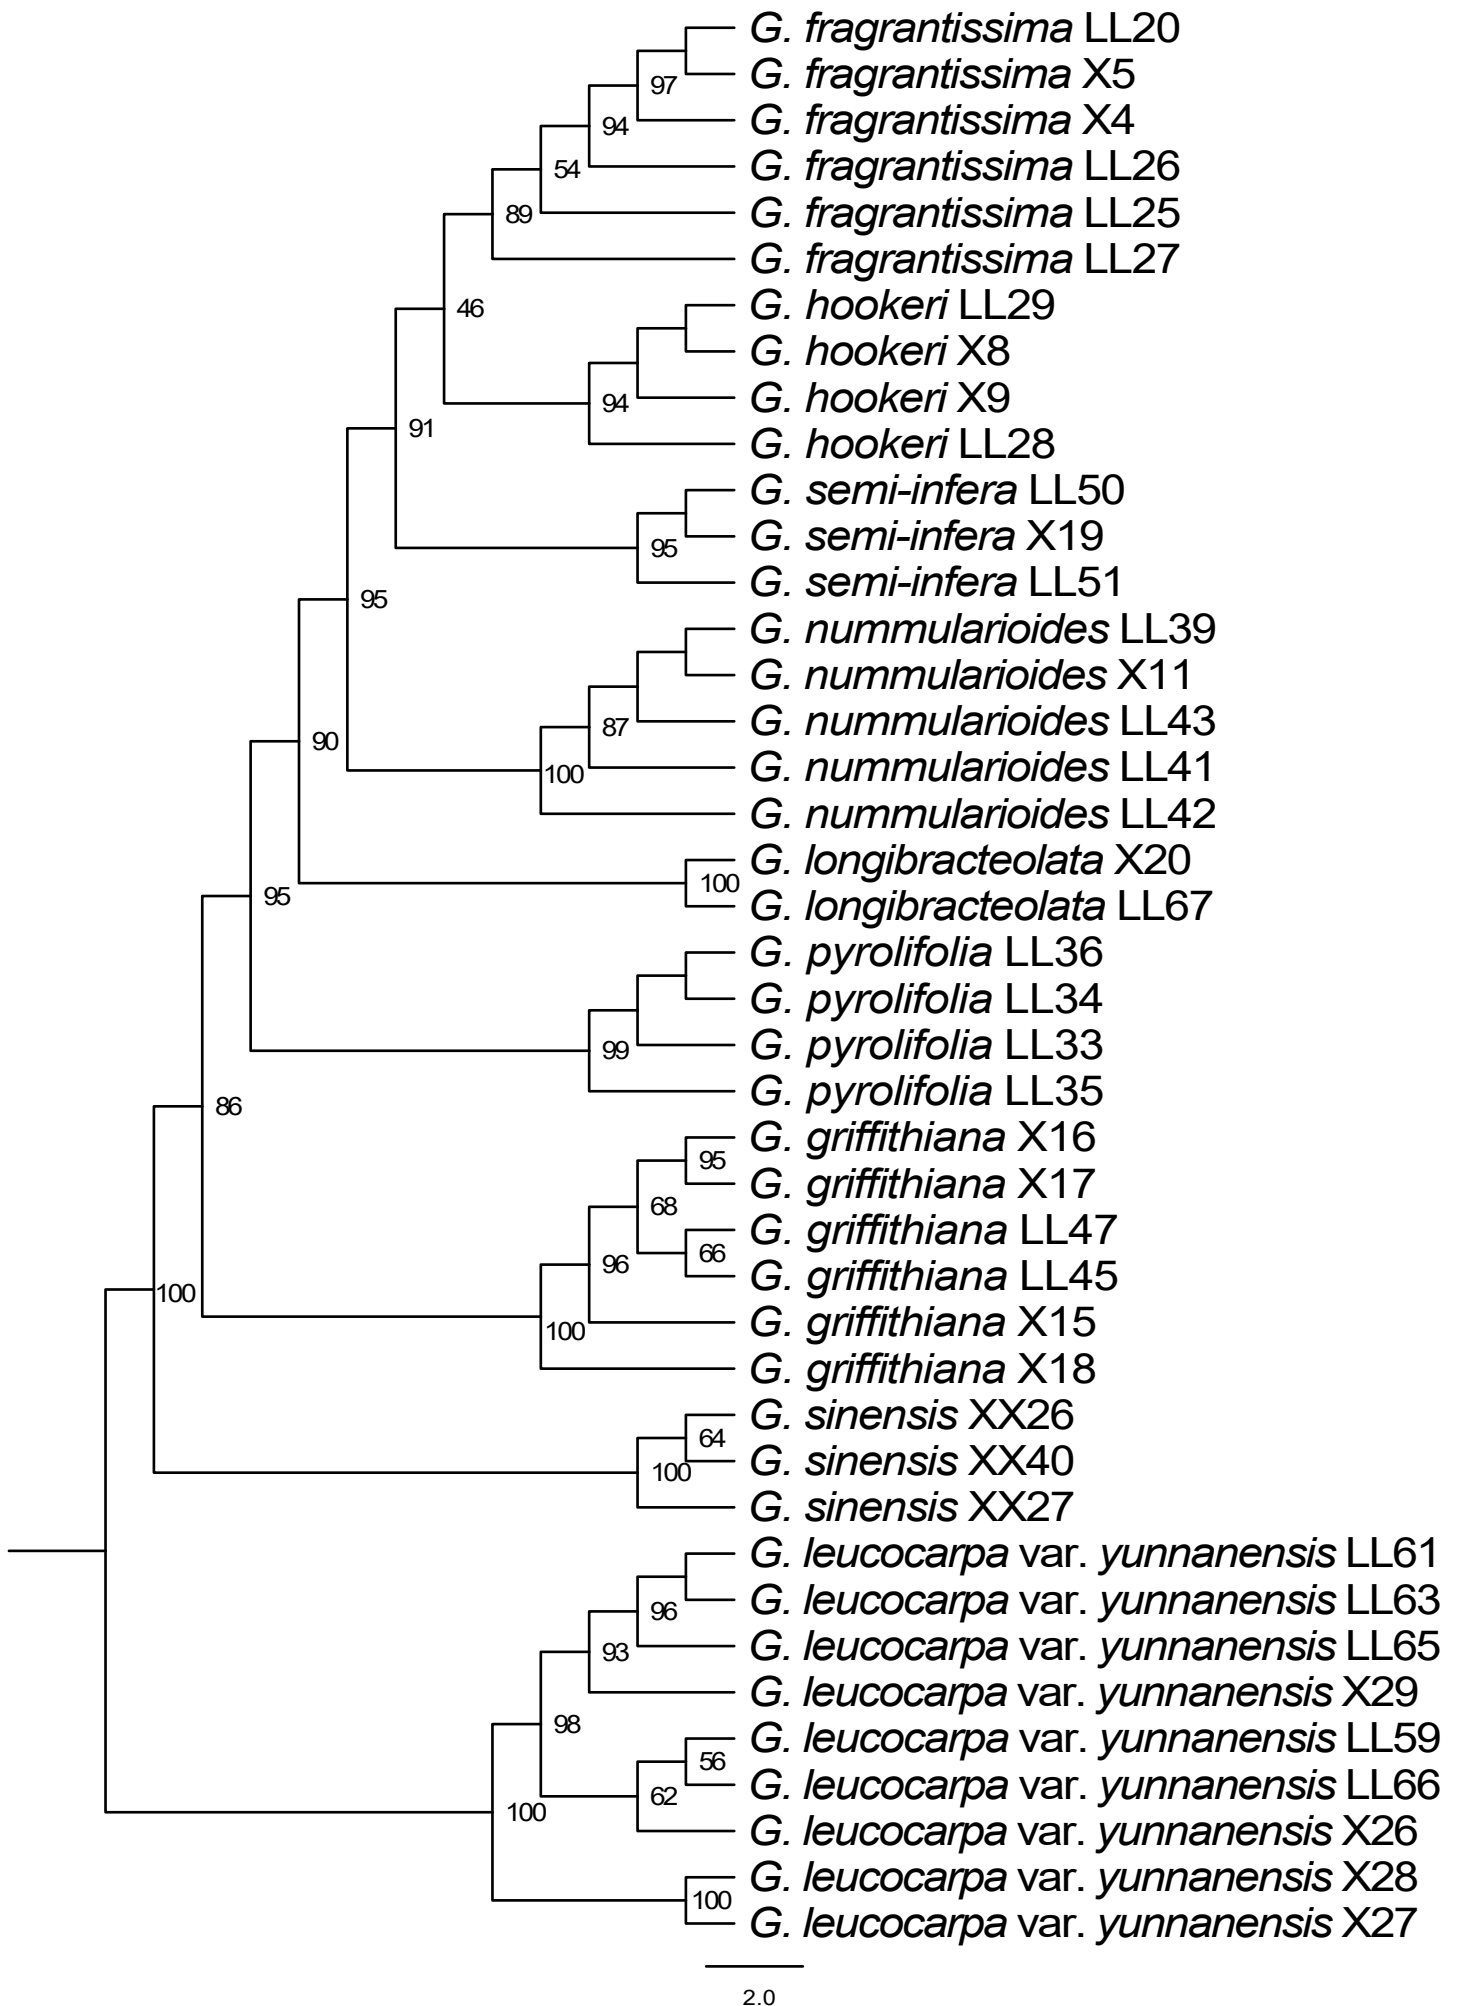

Fig. S1. A maximum-likelihood tree based on 42 plastomes inferred from *trnV-rps12* region.

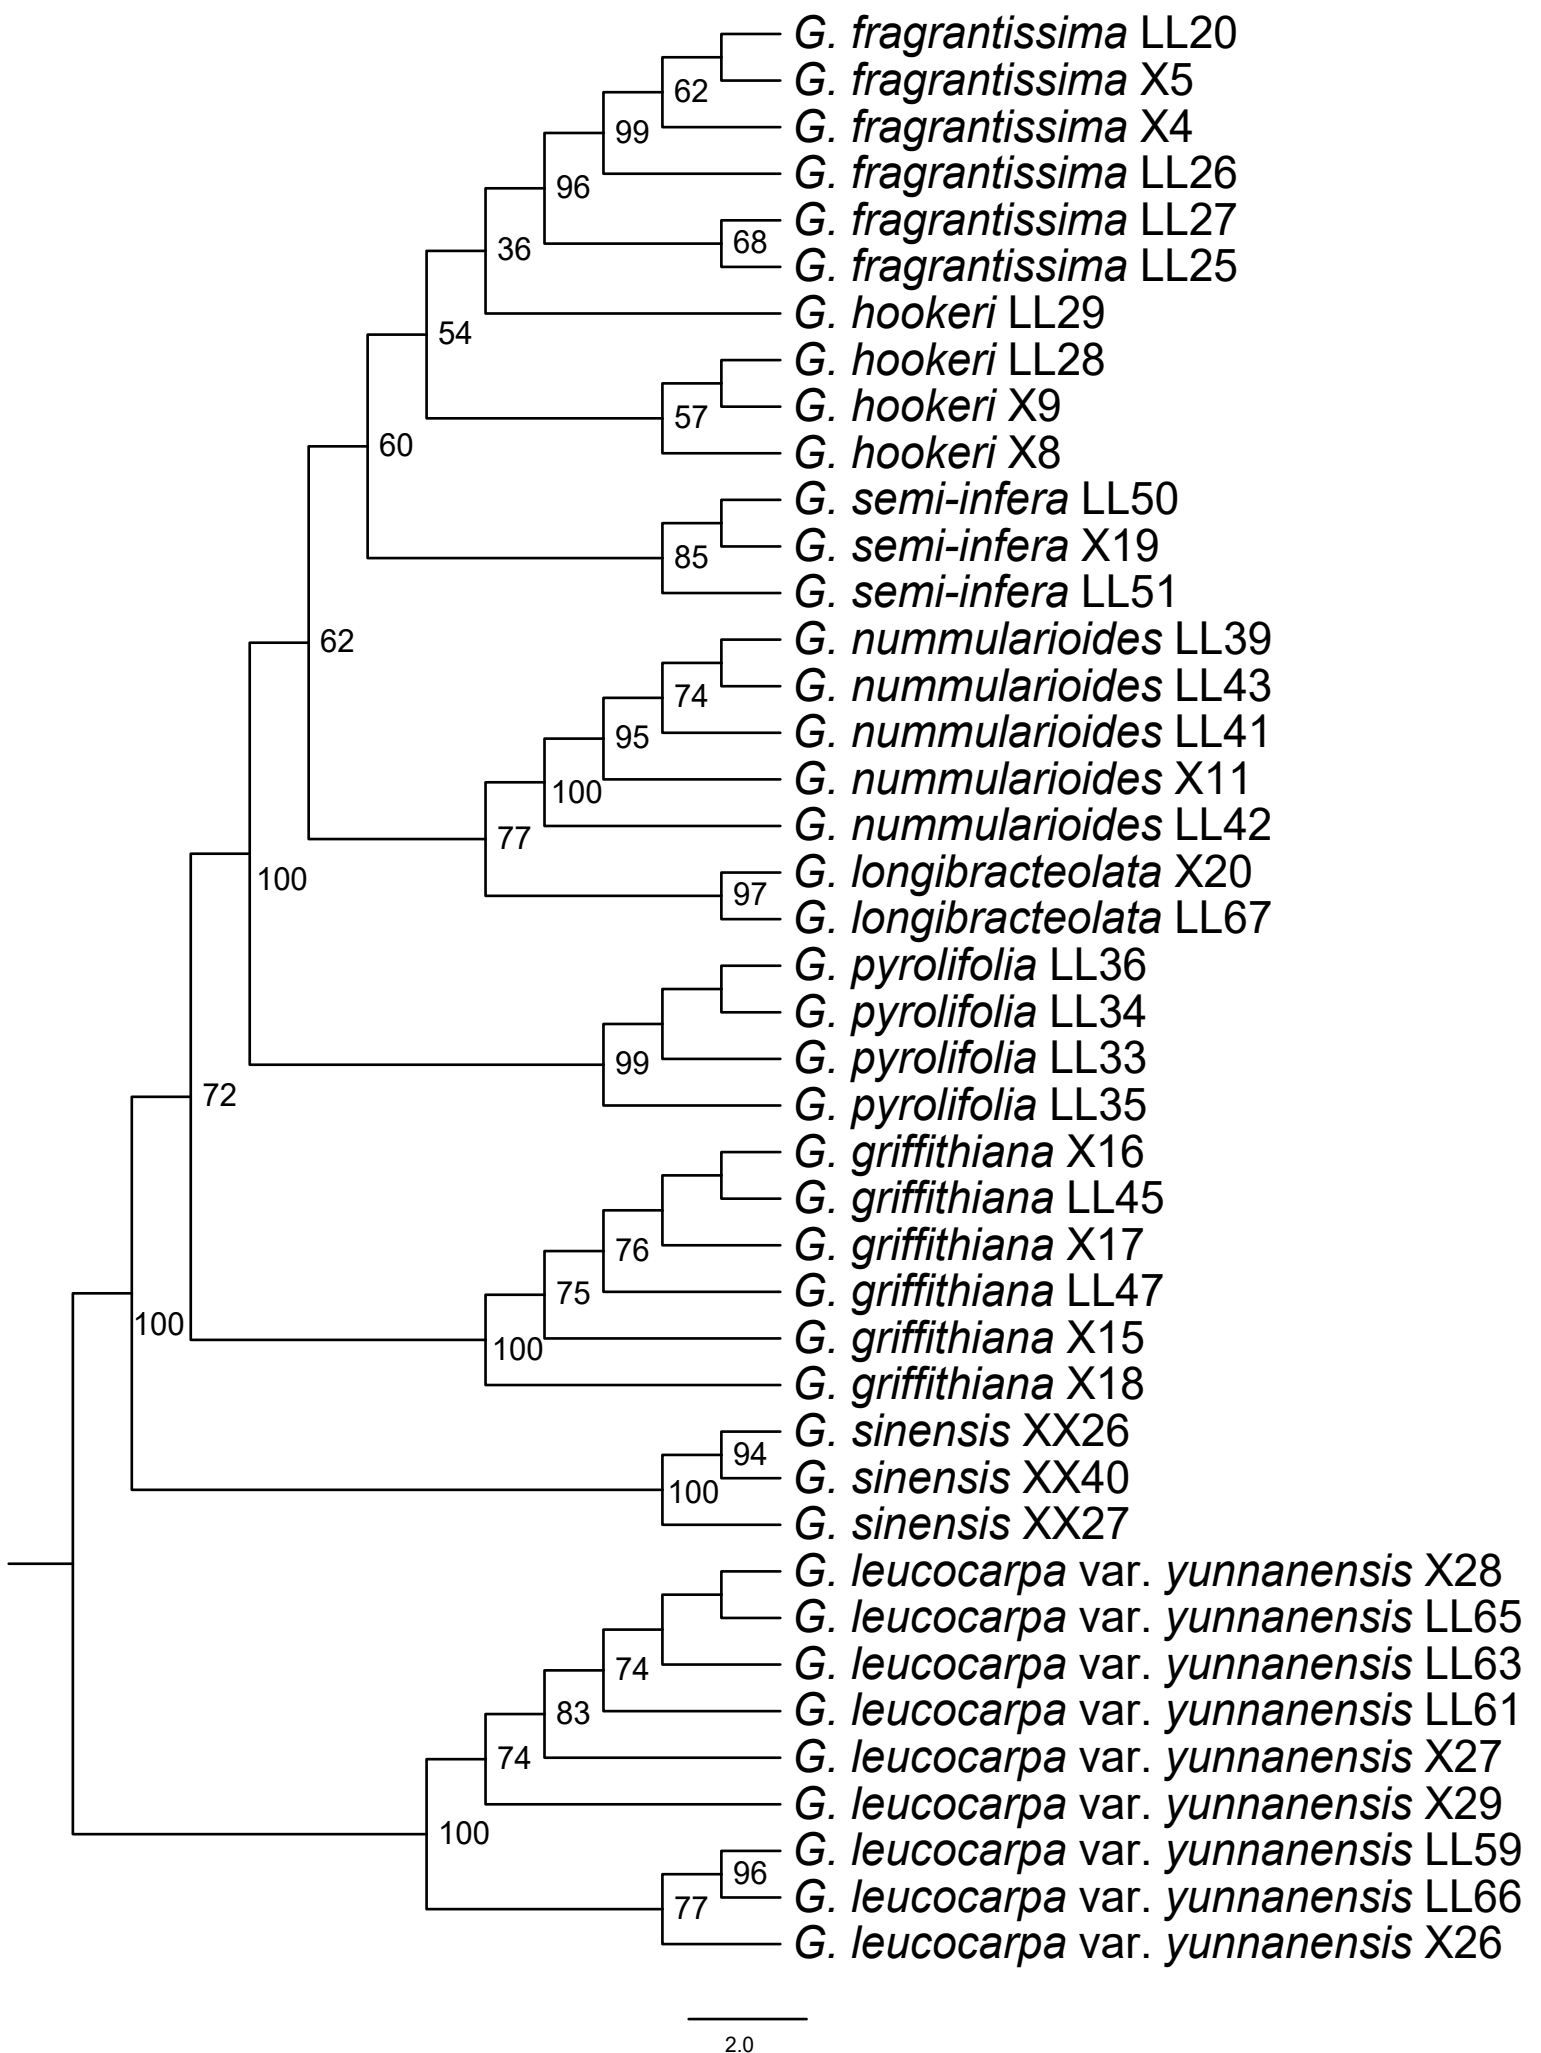

Fig. S2. A maximum-likelihood tree based on 42 plastomes inferred from *trnQ-psaA* region.

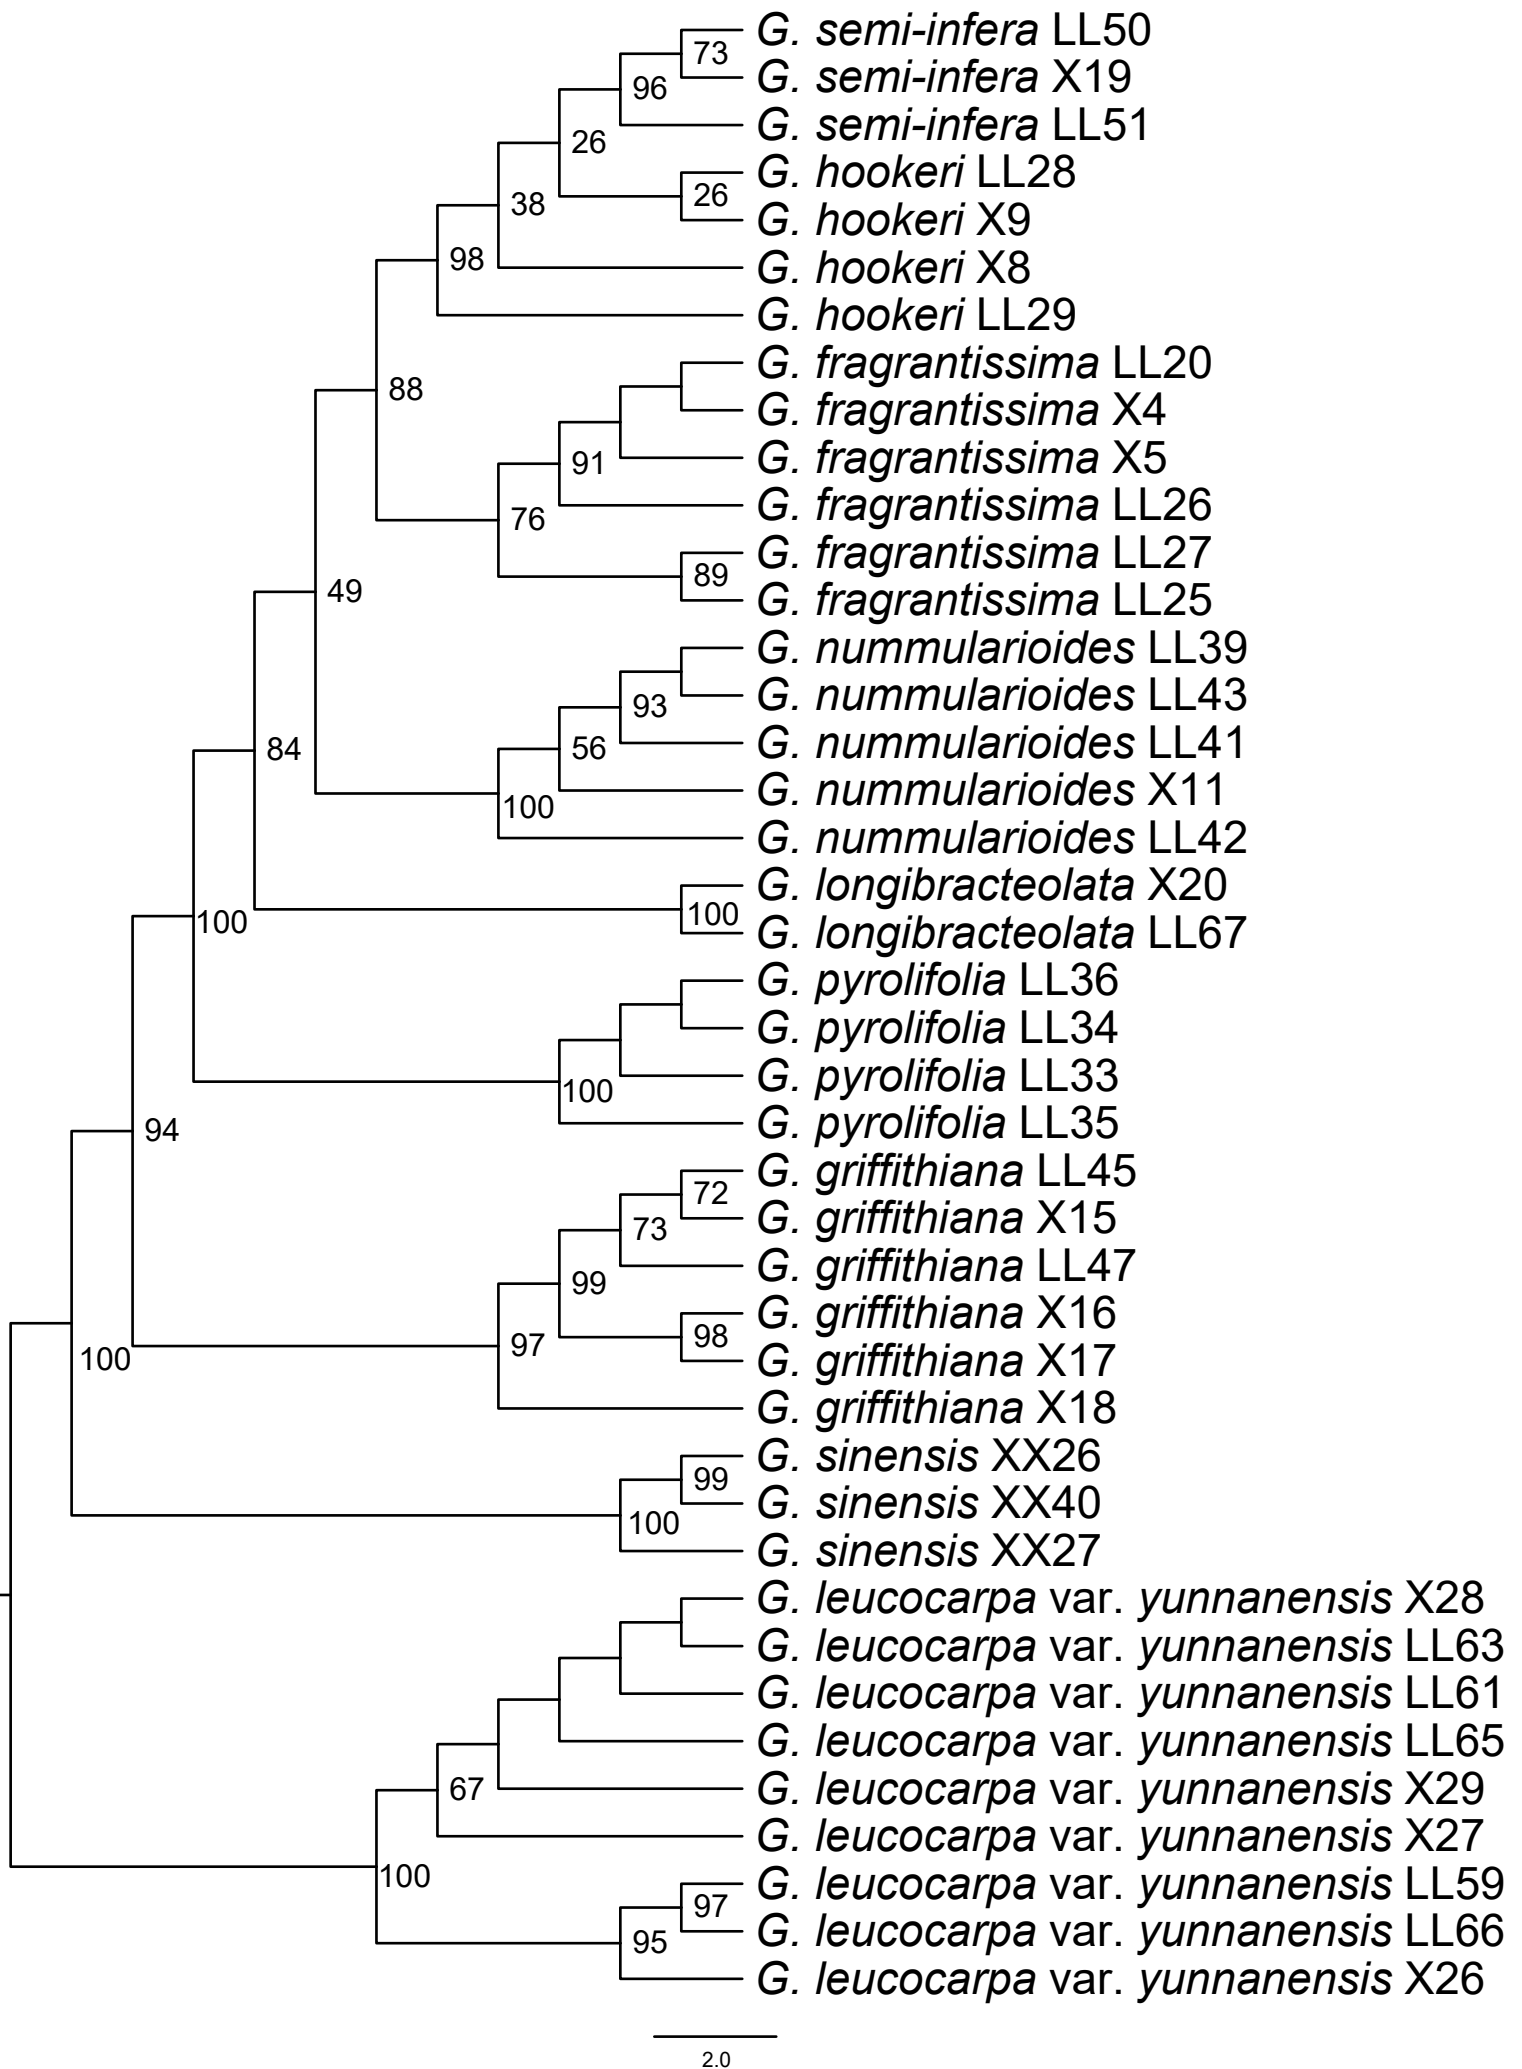

Fig. S3. A maximum-likelihood tree based on 42 plastomes inferred from *ndhF* region.

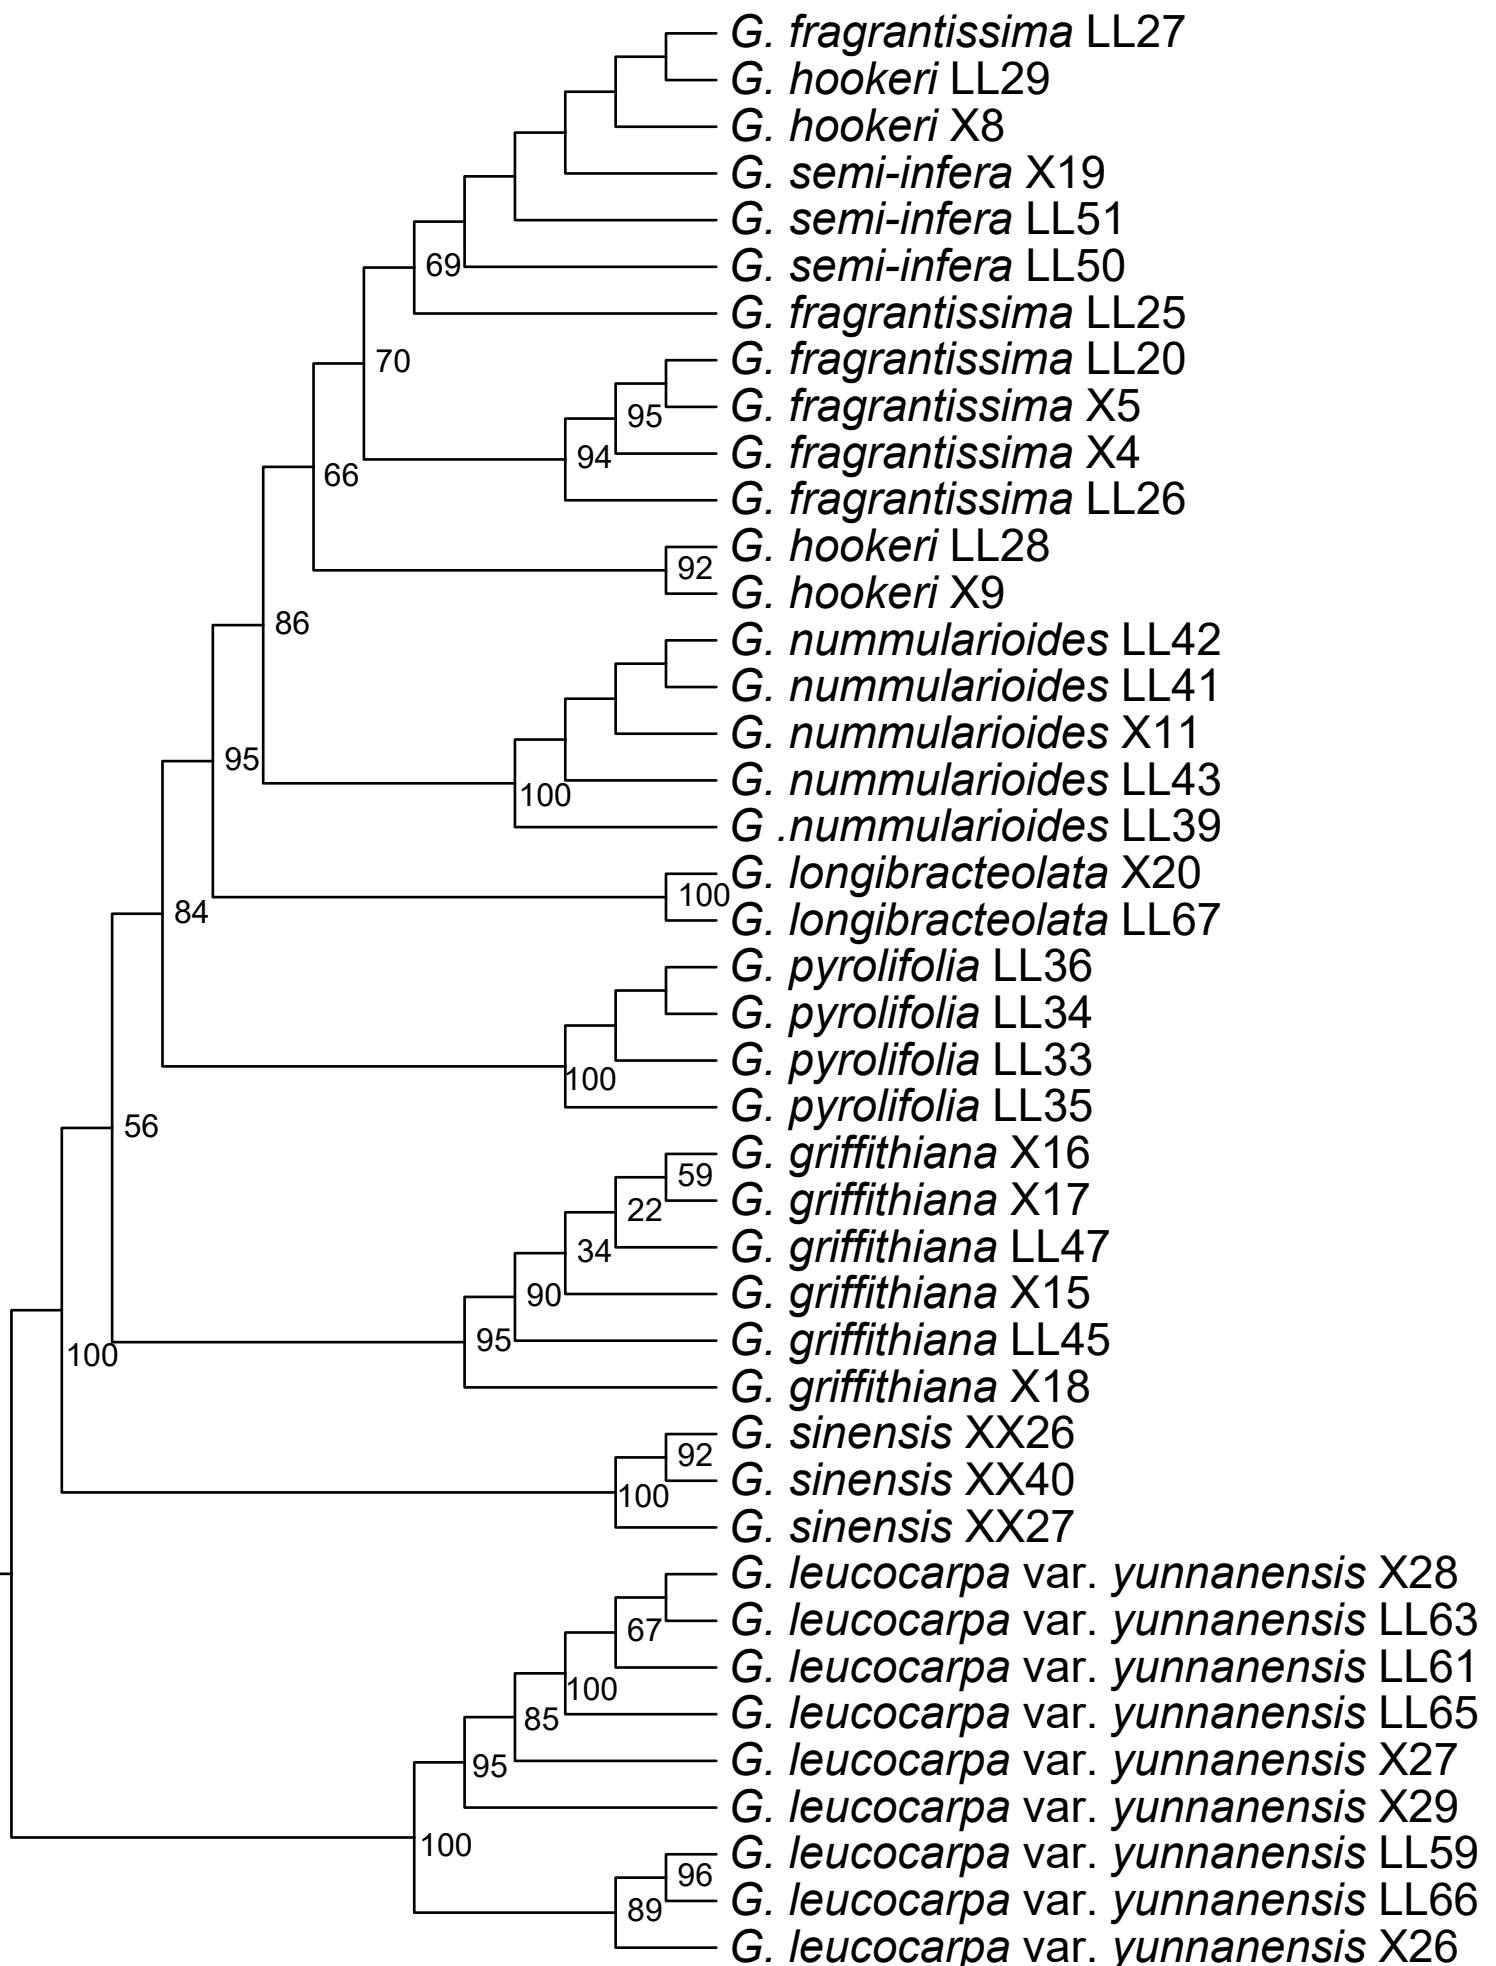

2.0

Fig. S4. A maximum-likelihood tree based on 42 plastomes inferred from *ycf3-trnK* region.

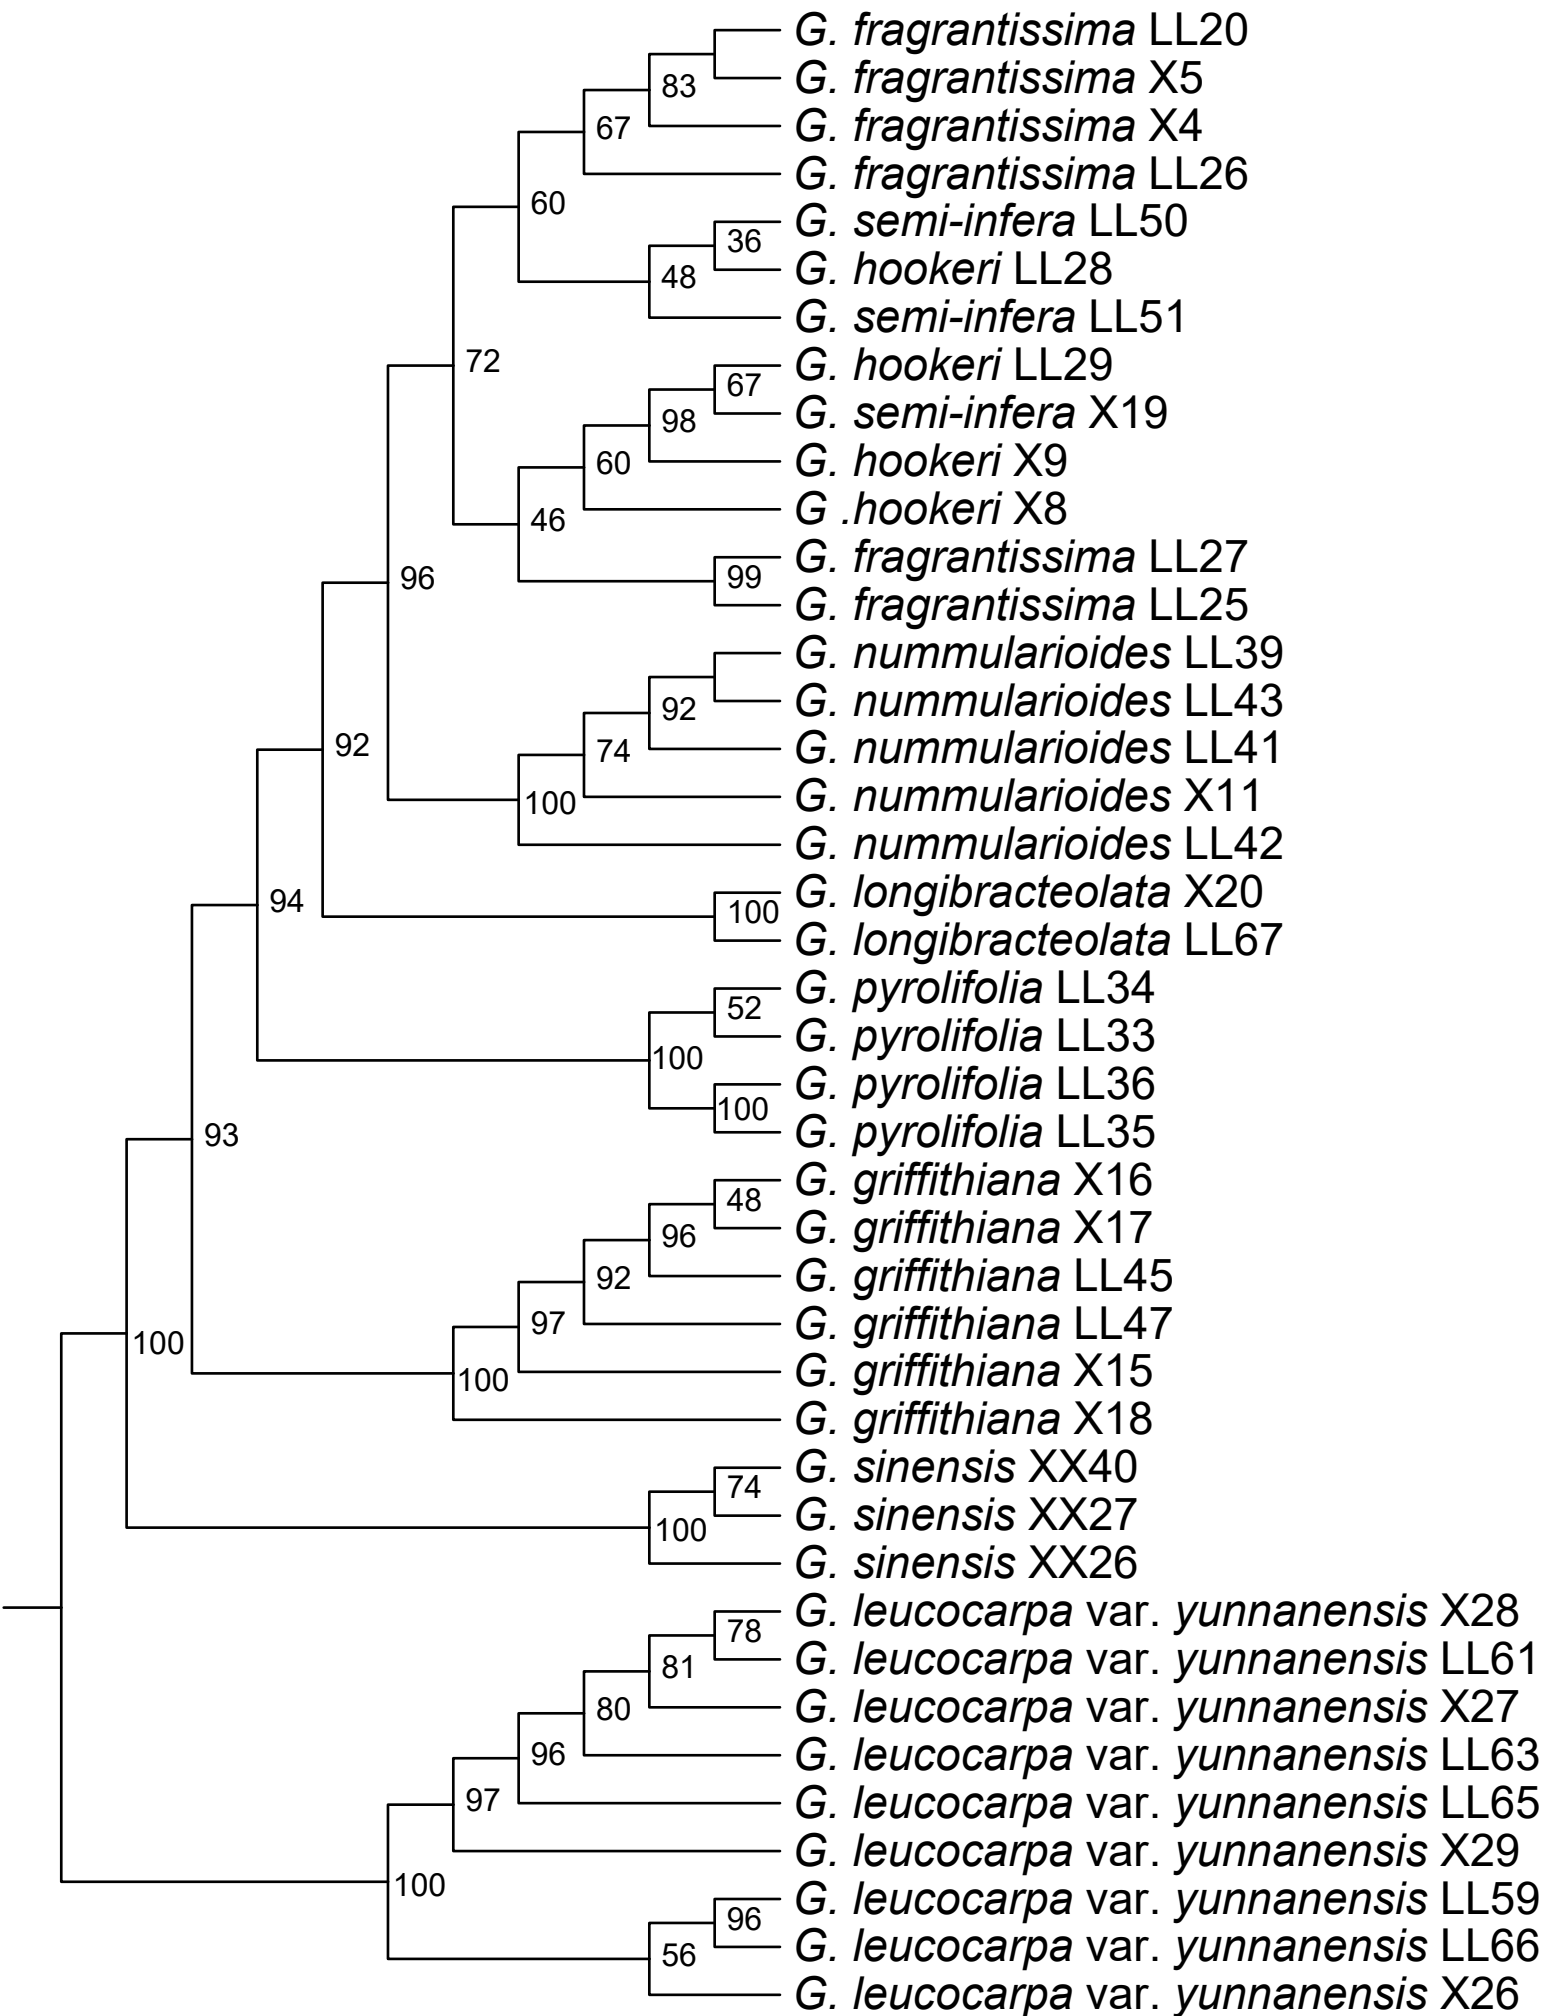

2.0

Fig. S5. A maximum-likelihood tree based on 42 plastomes inferred from *psal-trnM* region.

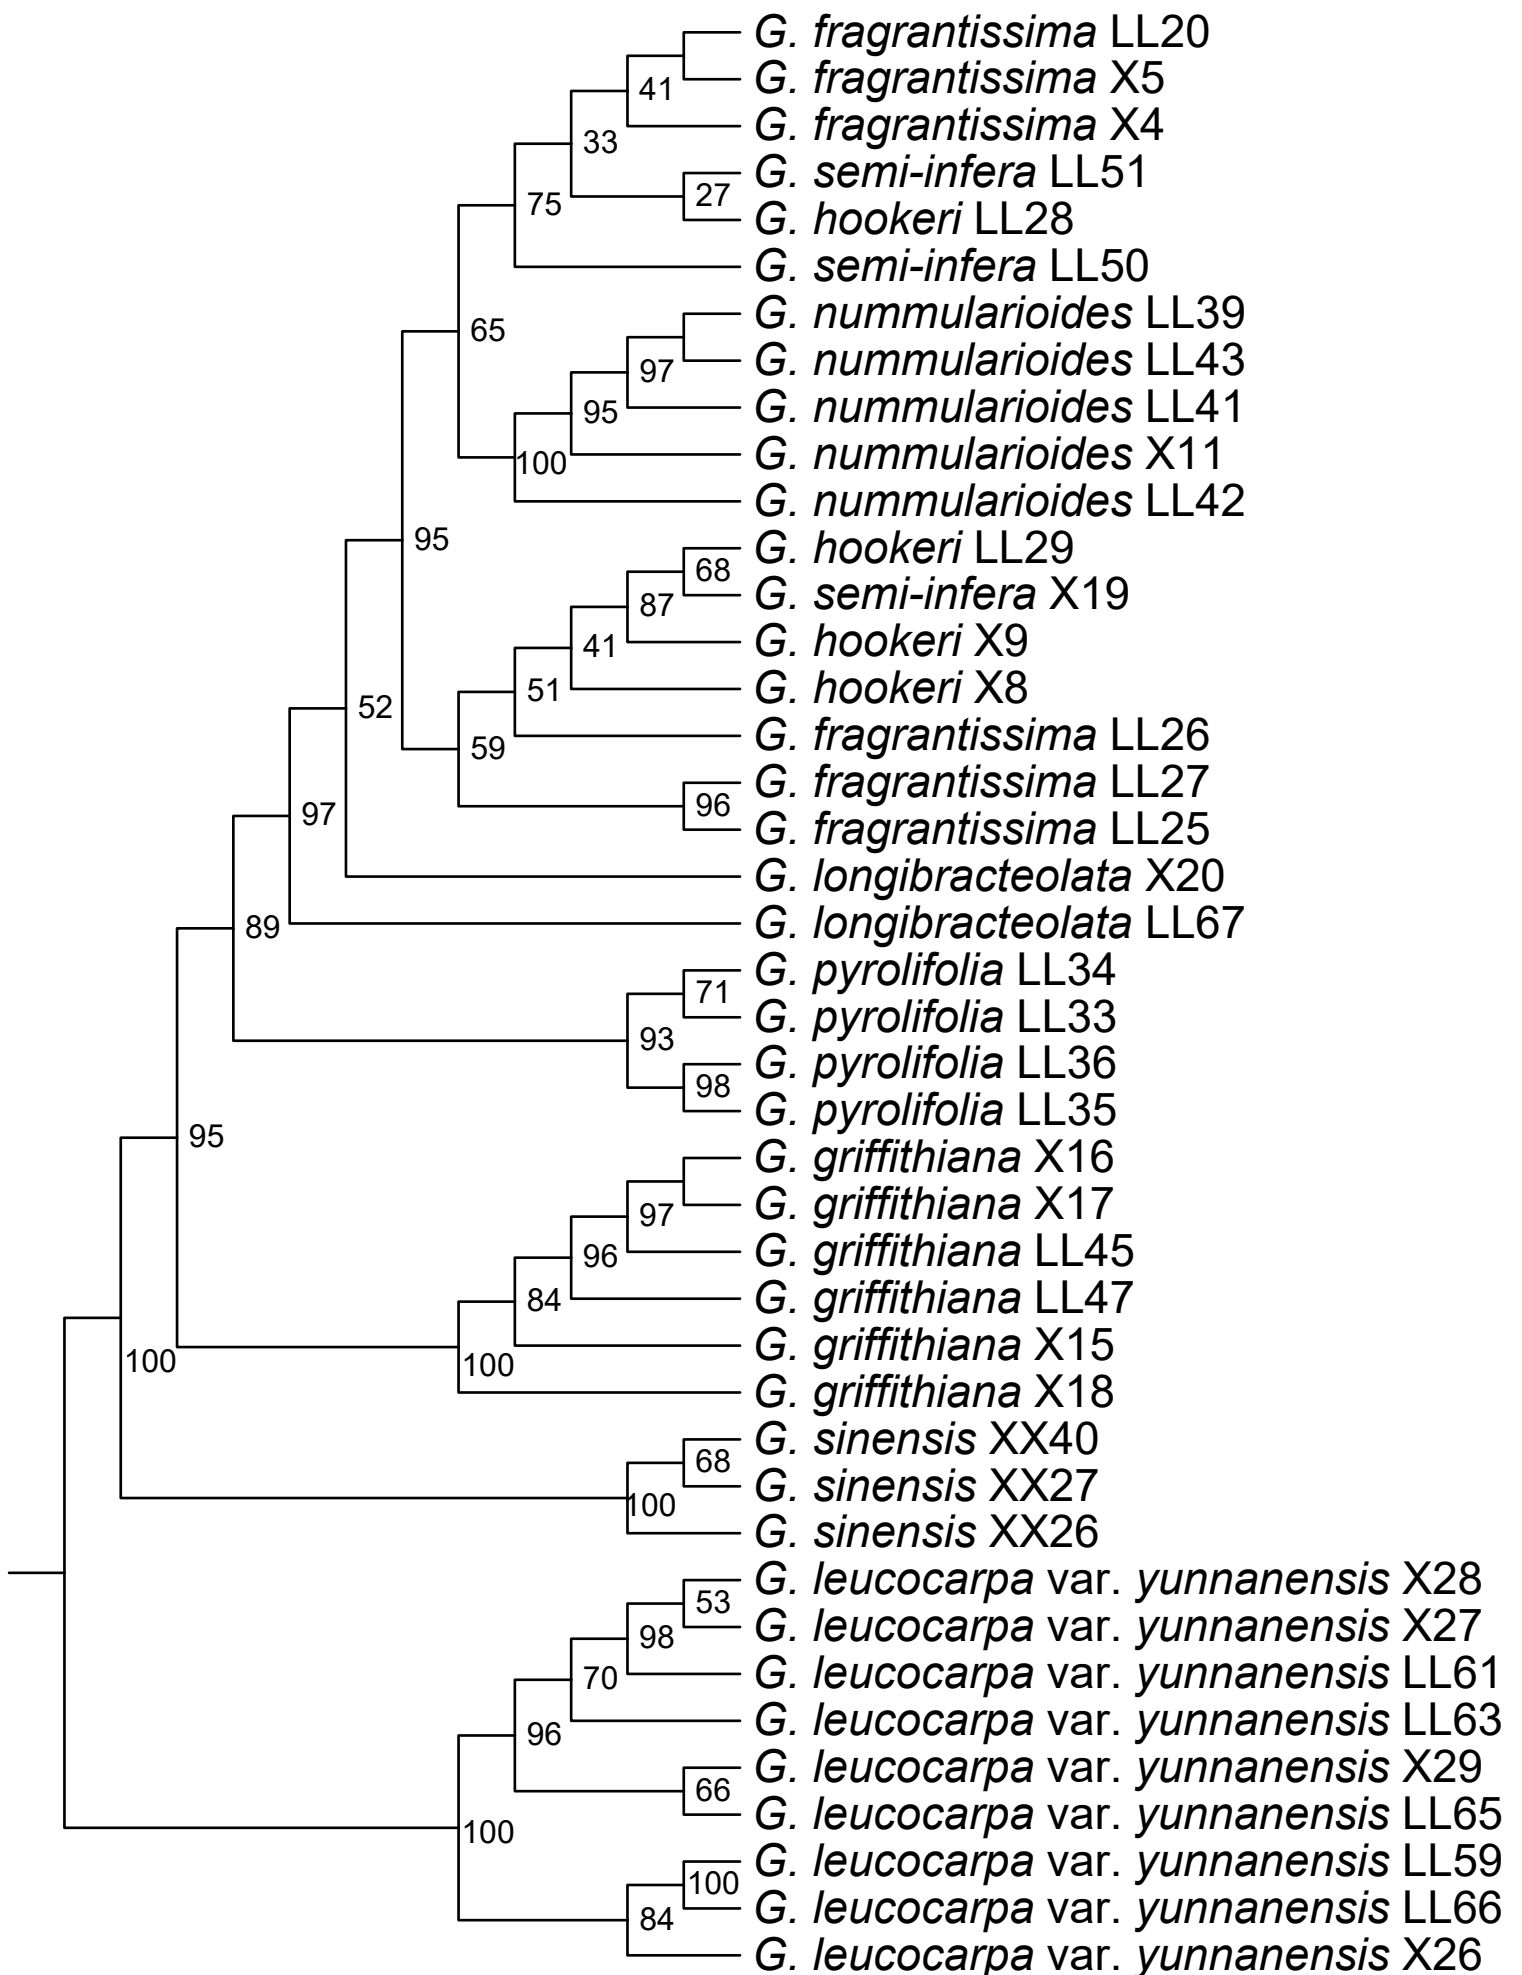

2.0

Fig. S6. A maximum-likelihood tree based on 42 plastomes inferred from *rps3-rpl16* region.

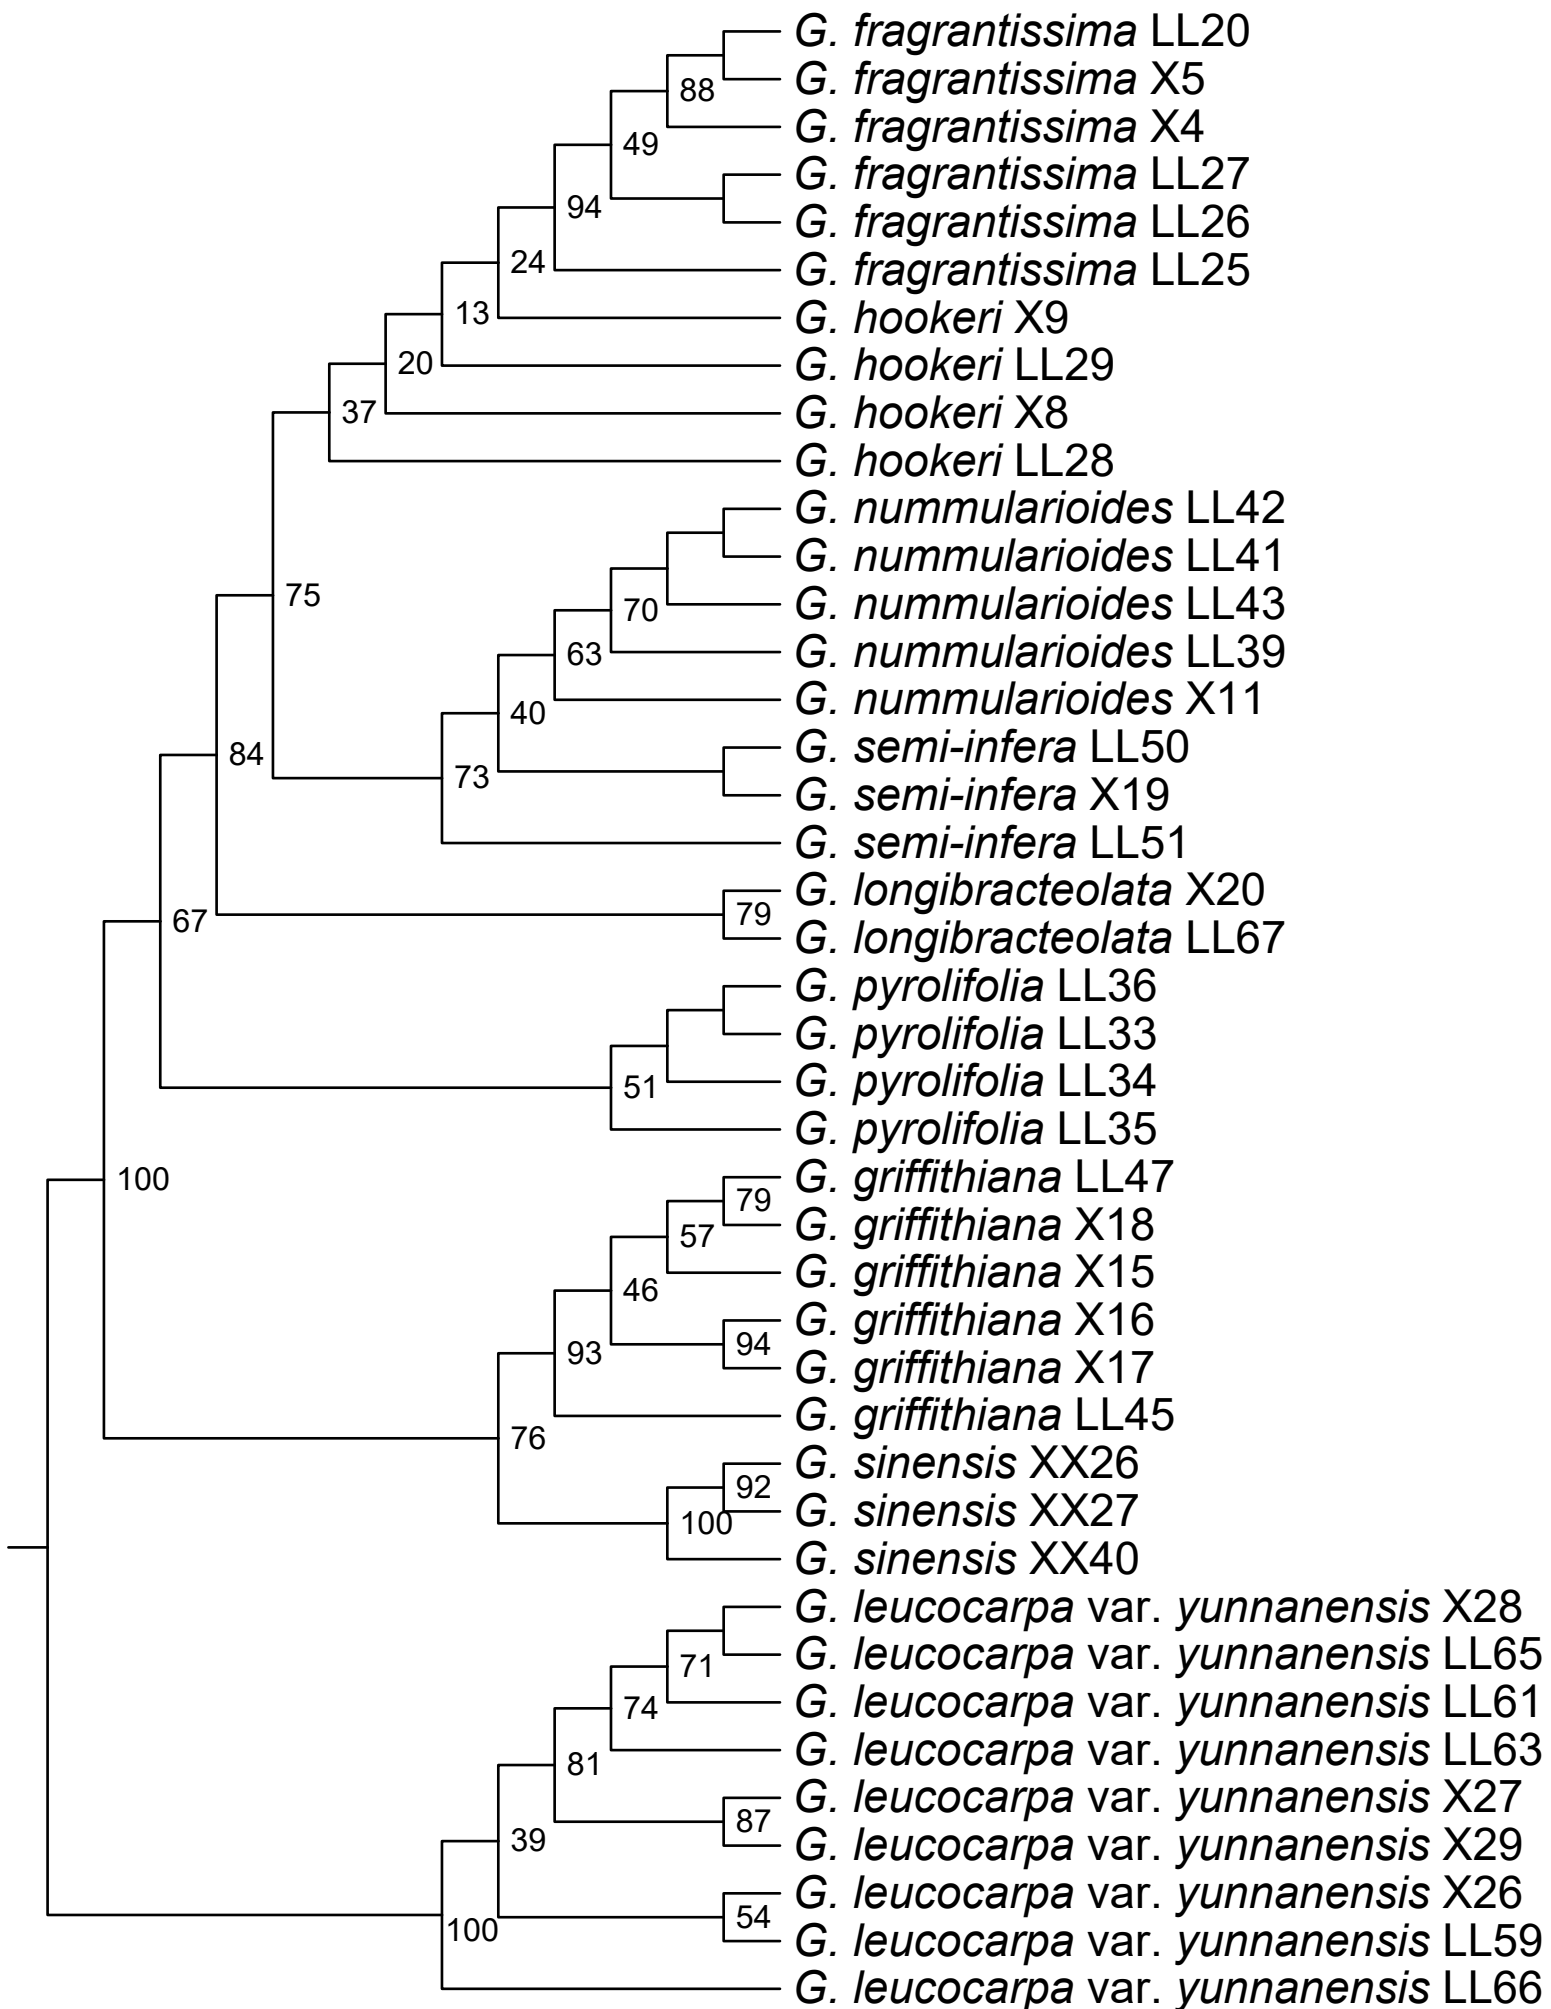

2.0

Fig. S7. A maximum-likelihood tree based on 42 plastomes inferred from *infA* region.
